# Supplementary material for: Transcriptional repression of NFKBIA triggers constitutive IKK‐ and proteasome‐independent p65/RelA activation in senescence
Source: PubMed Central journal article supplement (PMC7957429; doi:10.15252/embj.2019104296), 2021-01-18
Supplement: EMBJ-40-e104296-s002.pdf [file EMBJ-40-e104296-s002.pdf]

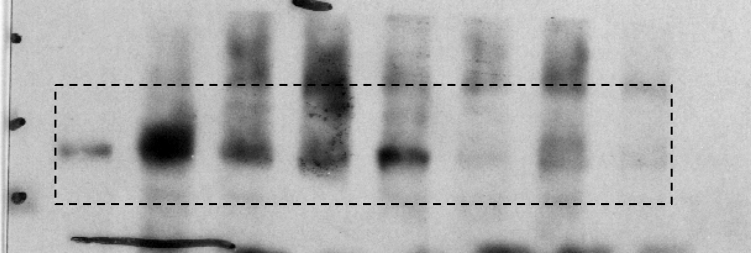

IKK $\alpha$ / $\beta$  pSer 176/180

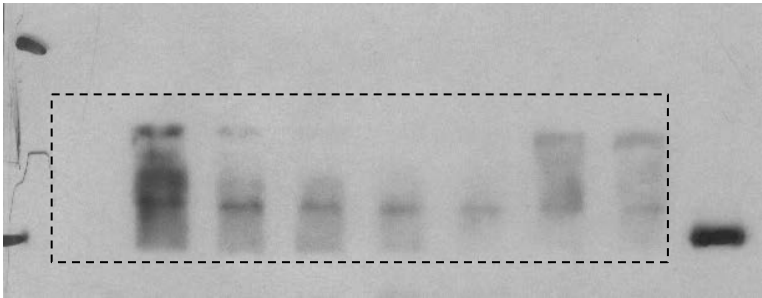

ATM pSer 1981

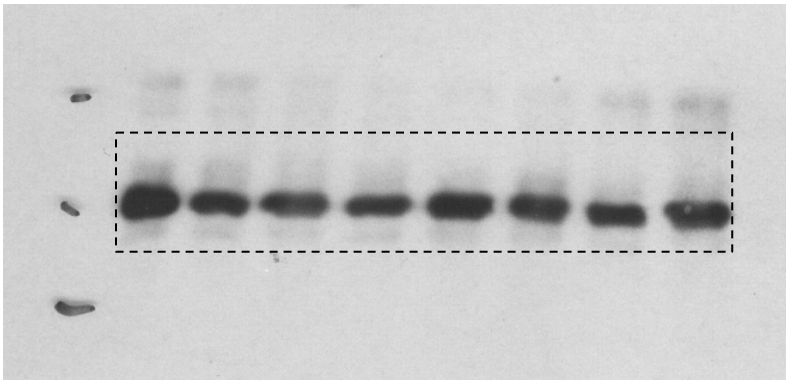

LDHA

Uncropped films used for Fig 5B. Also shown loading control LDHA.

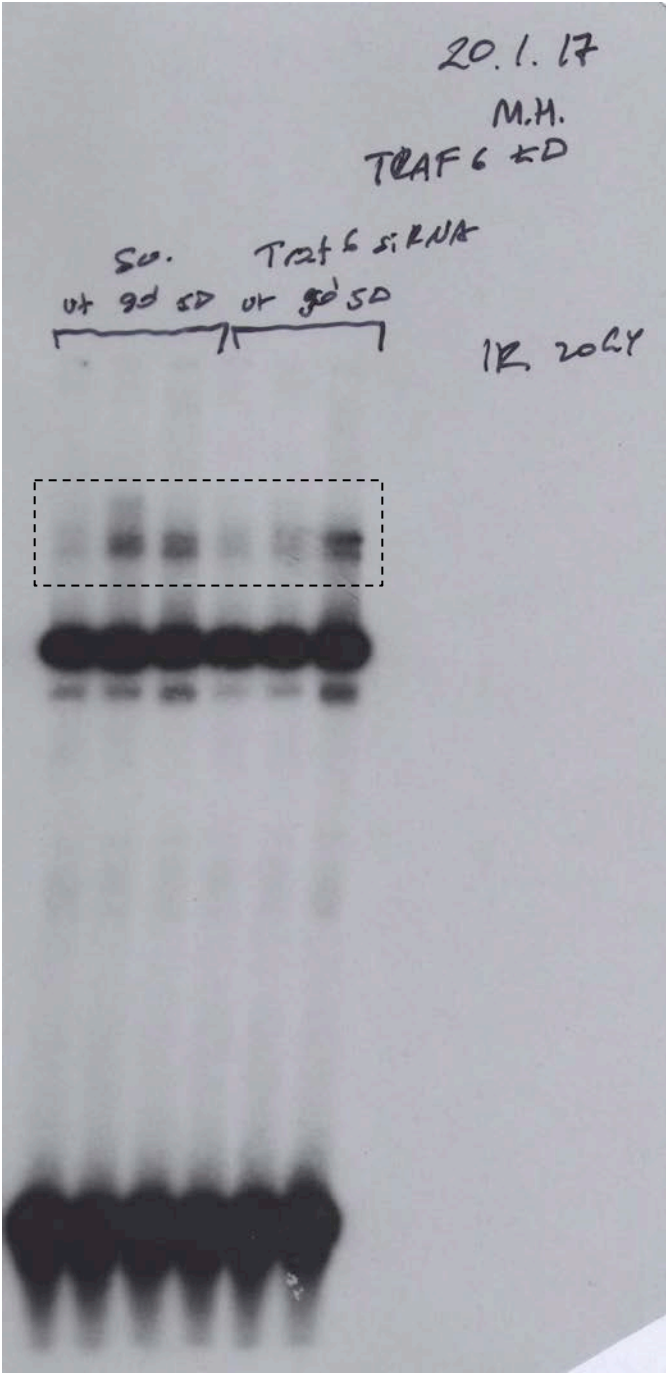

NF-kB EMSA

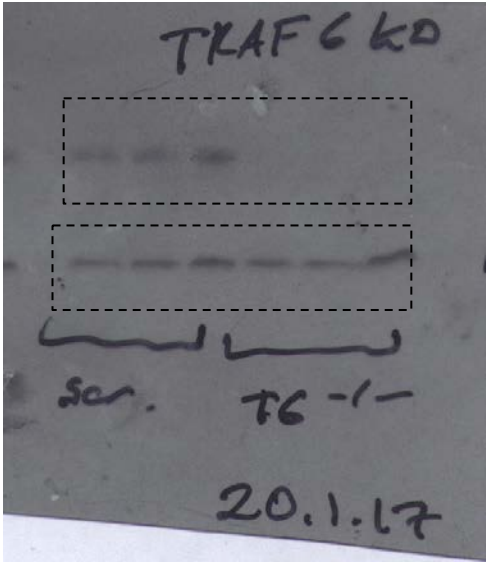

TRAF6-WB

Uncropped X-ray film (EMSA) and TRAF6 blot used for Fig 5C.

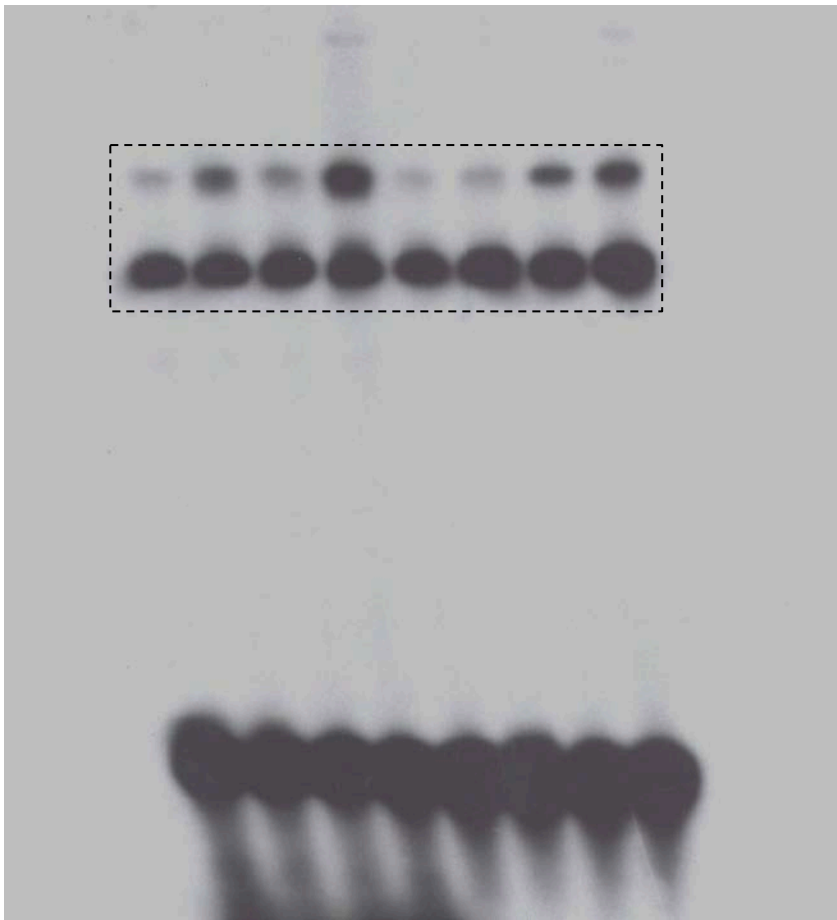

EMSA *IKBKB*  
CRISPR ko

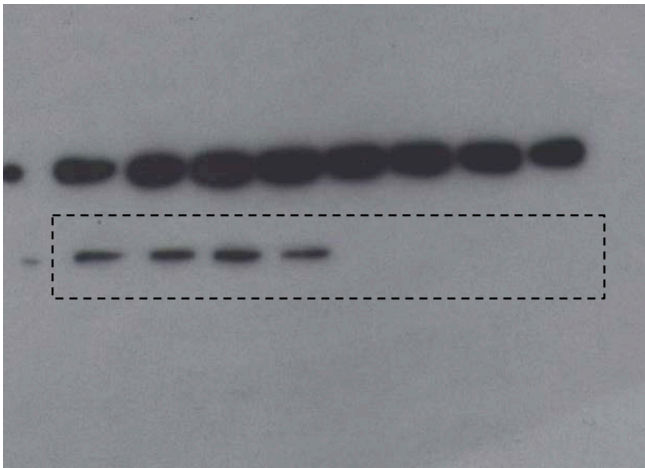

Ikkβ

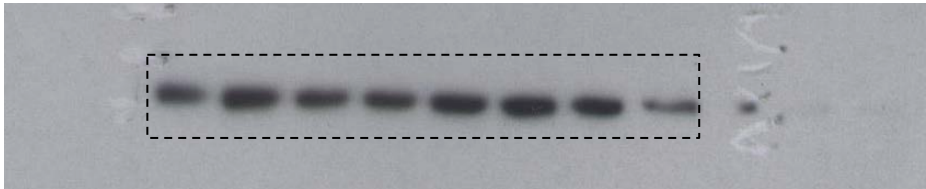

β-Actin

Uncropped X-ray film (EMSA) and blots used for Fig 5E. Also shown loading control β-Actin.
